# Supplementary material for: Analysis of Post-Traumatic Brain Injury Gene Expression Signature Reveals Tubulins, Nfe2l2, Nfkb, Cd44, and S100a4 as Treatment Targets
Source: PubMed Central journal article supplement (PMC4987651; doi:10.1038/srep31570), 2016-08-17
Supplement: srep31570-s1.pdf [file srep31570-s1.pdf]

# Analysis of Post-Traumatic Brain Injury Gene Expression Signature Reveals Tubulins, NFE2L2, NFkB, CD44, and S100A4 as Treatment Targets

Anssi Lipponen, Jussi Paananen, Noora Puhakka, Asla Pitkänen

## Supplementary Table 1

| Supplementary Table 1. Enriched gene ontology terms in the perilesional cortex. |             |                    |
|---------------------------------------------------------------------------------|-------------|--------------------|
| Name                                                                            | FDR q-val   | Pos/Neg enrichment |
| STRUCTURAL_CONSTITUENT_OF_RIBOSOME                                              | 0           | Pos                |
| PROTEINACEOUS_EXTRACELLULAR_MATRIX                                              | 0           | Pos                |
| DEFENSE_RESPONSE                                                                | 0           | Pos                |
| COLLAGEN                                                                        | 0           | Pos                |
| RESPONSE_TO_OTHER_ORGANISM                                                      | 0           | Pos                |
| EXTRACELLULAR_MATRIX                                                            | 0           | Pos                |
| EXTRACELLULAR_MATRIX_PART                                                       | 0,001416899 | Pos                |
| INFLAMMATORY_RESPONSE                                                           | 0,001239786 | Pos                |
| RESPONSE_TO_VIRUS                                                               | 0,001229948 | Pos                |
| IMMUNE_RESPONSE                                                                 | 0,003123401 | Pos                |
| CHEMOKINE_ACTIVITY                                                              | 0,00691114  | Pos                |
| I_KAPPAB_KINASE_NF_KAPPAB_CASCADE                                               | 0,009965185 | Pos                |
| VOLTAGE_GATED_CHANNEL_ACTIVITY                                                  | 0           | Neg                |
| VOLTAGE_GATED_CATION_CHANNEL_ACTIVITY                                           | 0           | Neg                |
| GATED_CHANNEL_ACTIVITY                                                          | 0           | Neg                |
| METAL_ION_TRANSMEMBRANE_TRANSPORTER_ACTIVITY                                    | 0           | Neg                |
| POTASSIUM_ION_TRANSPORT                                                         | 0           | Neg                |
| CATION_CHANNEL_ACTIVITY                                                         | 0           | Neg                |
| VOLTAGE_GATED_POTASSIUM_CHANNEL_ACTIVITY                                        | 1,35E-04    | Neg                |
| ION_CHANNEL_ACTIVITY                                                            | 1,18E-04    | Neg                |
| VOLTAGE_GATED_CALCIIUM_CHANNEL_COMPLEX                                          | 1,05E-04    | Neg                |
| SYNAPTIC_TRANSMISSION                                                           | 9,44E-05    | Neg                |
| TRANSMISSION_OF_NERVE_IMPULSE                                                   | 8,58E-05    | Neg                |
| METAL_ION_TRANSPORT                                                             | 7,86E-05    | Neg                |
| MONOVALENT_INORGANIC_CATION_TRANSPORT                                           | 1,41E-04    | Neg                |
| POTASSIUM_CHANNEL_ACTIVITY                                                      | 1,31E-04    | Neg                |
| VOLTAGE_GATED_POTASSIUM_CHANNEL_COMPLEX                                         | 1,22E-04    | Neg                |
| SUBSTRATE_SPECIFIC_CHANNEL_ACTIVITY                                             | 1,14E-04    | Neg                |
| PROTEASOME_COMPLEX                                                              | 2,15E-04    | Neg                |
| SYNAPSE_ORGANIZATION_AND_BIOGENESIS                                             | 2,03E-04    | Neg                |
| VOLTAGE_GATED_CALCIIUM_CHANNEL_ACTIVITY                                         | 1,92E-04    | Neg                |
| CATION_TRANSMEMBRANE_TRANSPORTER_ACTIVITY                                       | 2,73E-04    | Neg                |
| CELLULAR_RESPIRATION                                                            | 8,92E-04    | Neg                |
| SYNAPSE                                                                         | 8,92E-04    | Neg                |
| NERVOUS_SYSTEM_DEVELOPMENT                                                      | 9,66E-04    | Neg                |
| CALCIUM_CHANNEL_ACTIVITY                                                        | 0,001185576 | Neg                |
| NEUROGENESIS                                                                    | 0,001174722 | Neg                |
| ION_TRANSMEMBRANE_TRANSPORTER_ACTIVITY                                          | 0,001199935 | Neg                |
| MICROTUBULE_ASSOCIATED_COMPLEX                                                  | 0,001155493 | Neg                |
| STRESS_ACTIVATED_PROTEIN_KINASE_SIGNALING_PATHWAY                               | 0,001369768 | Neg                |
| DENDRITE                                                                        | 0,001385402 | Neg                |
| NEUROTRANSMITTER_RECEPTOR_ACTIVITY                                              | 0,00157421  | Neg                |
| GENERATION_OF_NEURONS                                                           | 0,001695259 | Neg                |
| GLUTAMATE_RECEPTOR_ACTIVITY                                                     | 0,001867902 | Neg                |
| CATION_TRANSPORT                                                                | 0,002028934 | Neg                |
| MITOCHONDRIAL_INNER_MEMBRANE                                                    | 0,00196926  | Neg                |
| MICROTUBULE_BASED_MOVEMENT                                                      | 0,002040412 | Neg                |
| MONOVALENT_INORGANIC_CATION_TRANSMEMBRANE_TRANSPORTER_ACTIVITY                  | 0,002059049 | Neg                |
| MITOCHONDRIAL_MEMBRANE                                                          | 0,002027047 | Neg                |
| NEURON_DIFFERENTIATION                                                          | 0,002399285 | Neg                |
| NEUROTRANSMITTER_BINDING                                                        | 0,002405064 | Neg                |
| MITOCHONDRIAL_MEMBRANE_PART                                                     | 0,002523794 | Neg                |
| JNK_CASCADE                                                                     | 0,005896469 | Neg                |
| ORGANELLE_INNER_MEMBRANE                                                        | 0,007973801 | Neg                |
| TUBULIN_BINDING                                                                 | 0,008412651 | Neg                |
| UBIQUITIN_CYCLE                                                                 | 0,008242112 | Neg                |
| CHANNEL_REGULATOR_ACTIVITY                                                      | 0,008293908 | Neg                |

Abbreviations: Name, Enriched gene ontology term; FDR q-val, False discovery rate q-value; Pos, positively enriched ontology term; Neg, negatively enriched ontology term.

## Supplementary Table 2

| Supplementary Table 2. Enriched gene ontology terms in the thalamus |             |                    |
|---------------------------------------------------------------------|-------------|--------------------|
| NAME                                                                | FDR q-val   | Pos/Neg enrichment |
| IMMUNE_RESPONSE                                                     | 0           | Pos                |
| BASOLATERAL_PLASMA_MEMBRANE                                         | 5,62E-04    | Pos                |
| IMMUNE_SYSTEM_PROCESS                                               | 0,001459492 | Pos                |
| DEFENSE_RESPONSE                                                    | 0,001373219 | Pos                |
| STRUCTURAL_CONSTITUENT_OF_RIBOSOME                                  | 0,002185657 | Pos                |
| I_KAPPAB_KINASE_NF_KAPPAB_CASCADE                                   | 0,005277846 | Pos                |
| CELL_JUNCTION                                                       | 0,004680899 | Pos                |
| RESPONSE_TO_OTHER_ORGANISM                                          | 0,005468081 | Pos                |
| INFLAMMATORY_RESPONSE                                               | 0,005588763 | Pos                |
| RESPONSE_TO_WOUNDING                                                | 0,005253211 | Pos                |
| REGULATION_OF_I_KAPPAB_KINASE_NF_KAPPAB_CASCADE                     | 0,005674641 | Pos                |
| EXTRACELLULAR_MATRIX_PART                                           | 0,007197761 | Pos                |
| POTASSIUM_ION_TRANSPORT                                             | 0           | Neg                |
| MITOCHONDRIAL_MEMBRANE                                              | 4,43E-04    | Neg                |
| MITOCHONDRIAL_MEMBRANE_PART                                         | 2,95E-04    | Neg                |
| VOLTAGE_GATED_CATION_CHANNEL_ACTIVITY                               | 4,39E-04    | Neg                |
| VOLTAGE_GATED_CHANNEL_ACTIVITY                                      | 3,51E-04    | Neg                |
| VOLTAGE_GATED_POTASSIUM_CHANNEL_ACTIVITY                            | 0,001032828 | Neg                |
| MITOCHONDRIAL_INNER_MEMBRANE                                        | 8,85E-04    | Neg                |
| POTASSIUM_CHANNEL_ACTIVITY                                          | 0,00122112  | Neg                |
| METAL_ION_TRANSMEMBRANE_TRANSPORTER_ACTIVITY                        | 0,001975178 | Neg                |
| VOLTAGE_GATED_POTASSIUM_CHANNEL_COMPLEX                             | 0,00196713  | Neg                |
| ORGANELLE_INNER_MEMBRANE                                            | 0,002372856 | Neg                |
| CELLULAR_RESPIRATION                                                | 0,002391202 | Neg                |
| MITOCHONDRIAL_ENVELOPE                                              | 0,002338413 | Neg                |
| MITOCHONDRIAL_RESPIRATORY_CHAIN                                     | 0,002234509 | Neg                |
| VOLTAGE_GATED_CALCIIUM_CHANNEL_ACTIVITY                             | 0,002626745 | Neg                |
| MITOCHONDRIAL_PART                                                  | 0,004482372 | Neg                |
| PROTEASOME_COMPLEX                                                  | 0,00437347  | Neg                |
| INORGANIC_CATION_TRANSMEMBRANE_TRANSPORTER_ACTIVITY                 | 0,004326779 | Neg                |
| METAL_ION_TRANSPORT                                                 | 0,006309745 | Neg                |
| GATED_CHANNEL_ACTIVITY                                              | 0,006543345 | Neg                |
| CATION_CHANNEL_ACTIVITY                                             | 0,0067354   | Neg                |
| VOLTAGE_GATED_CALCIIUM_CHANNEL_COMPLEX                              | 0,006429246 | Neg                |
| ORGANELLE_ENVELOPE                                                  | 0,007948274 | Neg                |
| ENVELOPE                                                            | 0,008040466 | Neg                |
| MONOVALENT_INORGANIC_CATION_TRANSPORT                               | 0,009620455 | Neg                |

Abbreviations: Name, Enriched gene ontology term; FDR q-val, False discovery rate q-value; Pos, positively enriched ontology term; Neg, negatively enriched ontology term.

### Supplementary Table 3

**Supplementary Table 3.** Three highest and lowest connectivity scores in the LINCS analysis. Scores are shown separately for neuron cell lines, neuron cell lines treated with KCl, and neural progenitors cell lines.

| Compound              | NEU highest connectivity score | NEU lowest connectivity score | NEU.KCL highest connectivity score | NEU.KCL lowest connectivity score | NPC highest connectivity score | NPC lowest connectivity score |
|-----------------------|--------------------------------|-------------------------------|------------------------------------|-----------------------------------|--------------------------------|-------------------------------|
| BRD-K91844626         | 0,3421                         | 0,2078                        | 0,2888                             | 0,2366                            | nd                             | nd                            |
| BRD-A11009626         | 0,3354                         | 0,3354                        | nd                                 | nd                                | nd                             | nd                            |
| NO-ASA                | 0,3267                         | 0,3267                        | 0,3455                             | 0,2084                            | 0,2753                         | 0,2463                        |
| BRD-K55260239         | -0,3115                        | -0,3115                       | nd                                 | nd                                | nd                             | nd                            |
| SDZ-NKT-343           | -0,3089                        | -0,3089                       | nd                                 | nd                                | nd                             | nd                            |
| STK-661558            | -0,3079                        | -0,3079                       | nd                                 | nd                                | nd                             | nd                            |
| BRD-K75971499         | 0,2184                         | 0,2184                        | 0,4029                             | 0,4029                            | nd                             | nd                            |
| lonomycin             | 0,2624                         | 0,2624                        | 0,3784                             | 0,3784                            | nd                             | nd                            |
| BG-1024               | nd                             | nd                            | 0,3743                             | 0,3743                            | 0,2797                         | 0,2797                        |
| Pioglitazone          | nd                             | nd                            | -0,3305                            | -0,3305                           | nd                             | nd                            |
| Desmethylclomipramine | 0,2765                         | 0,2765                        | 0,2867                             | -0,307                            | nd                             | nd                            |
| BRD-K72015216         | nd                             | nd                            | -0,3012                            | -0,3012                           | nd                             | nd                            |
| BRD-K78075916         | nd                             | nd                            | 0,1948                             | 0,1948                            | 0,3355                         | 0,3355                        |
| Parthenolide          | nd                             | nd                            | nd                                 | nd                                | 0,334                          | 0,334                         |
| XE-991                | nd                             | nd                            | nd                                 | nd                                | 0,3263                         | 0,3263                        |
| BRD-K46047563         | nd                             | nd                            | nd                                 | nd                                | -0,3097                        | -0,3097                       |
| Testosterone          | nd                             | nd                            | nd                                 | nd                                | 0,2464                         | -0,3059                       |
| UCL-2077              | nd                             | nd                            | nd                                 | nd                                | -0,3004                        | -0,3004                       |
| Sirolimus             | -0,2127                        | -0,2127                       | 0,2853                             | 0,2853                            | 0,2888                         | 0,2143                        |
| Celecoxib             | 0,2094                         | 0,2094                        | 0,2822                             | 0,2822                            | nd                             | nd                            |
| Carbamazepine         | nd                             | nd                            | 0,3075                             | -0,1693                           | nd                             | nd                            |

Abbreviations: NEU, Neuron cell lines; NEU.KCL, Neuron cell lines treated with KCl; NPC, Neural progenitors cell lines; nd, No data in LINCS database; LINCS, Library of Integrated Cellular Signatures The 3 cell lines were chosen as they (a) represent neuronal cell lines, (b) mimic increased excitability (NEU.KCL) which has previously been reported to be recovery-enhancing in TBI and other acquired brain-injury model<sup>1-3</sup>, or (c) model developing cells, recapitulating the developmental processes that become activated after brain injury<sup>4</sup>.

BRD-K91844626 1/2

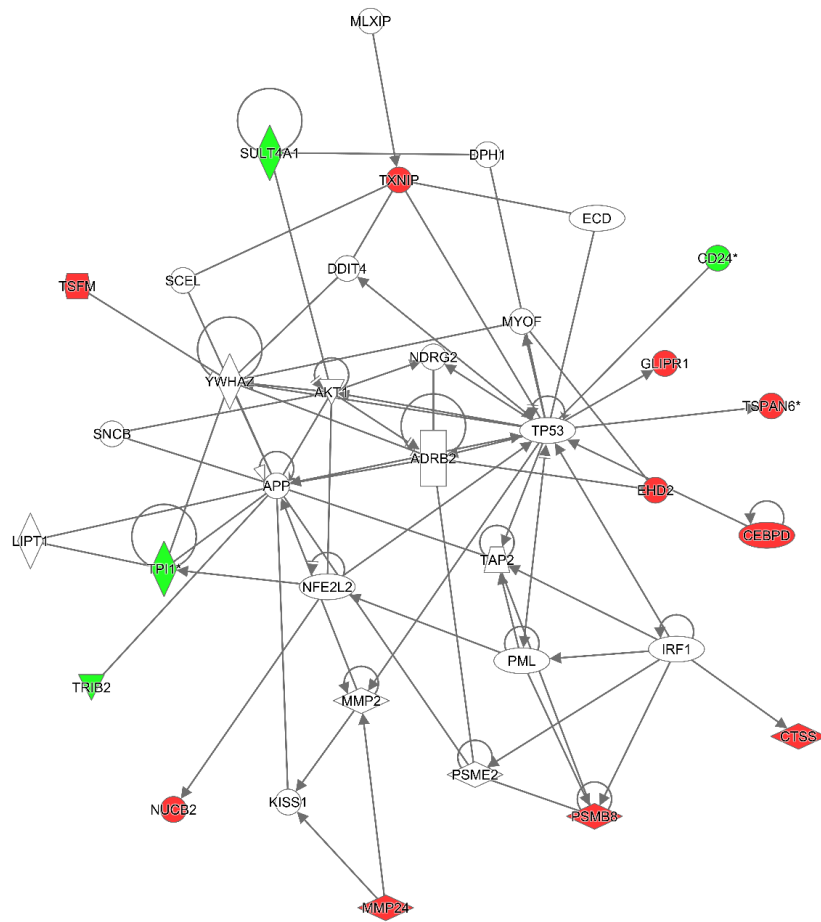

BRD-K91844626 2/2

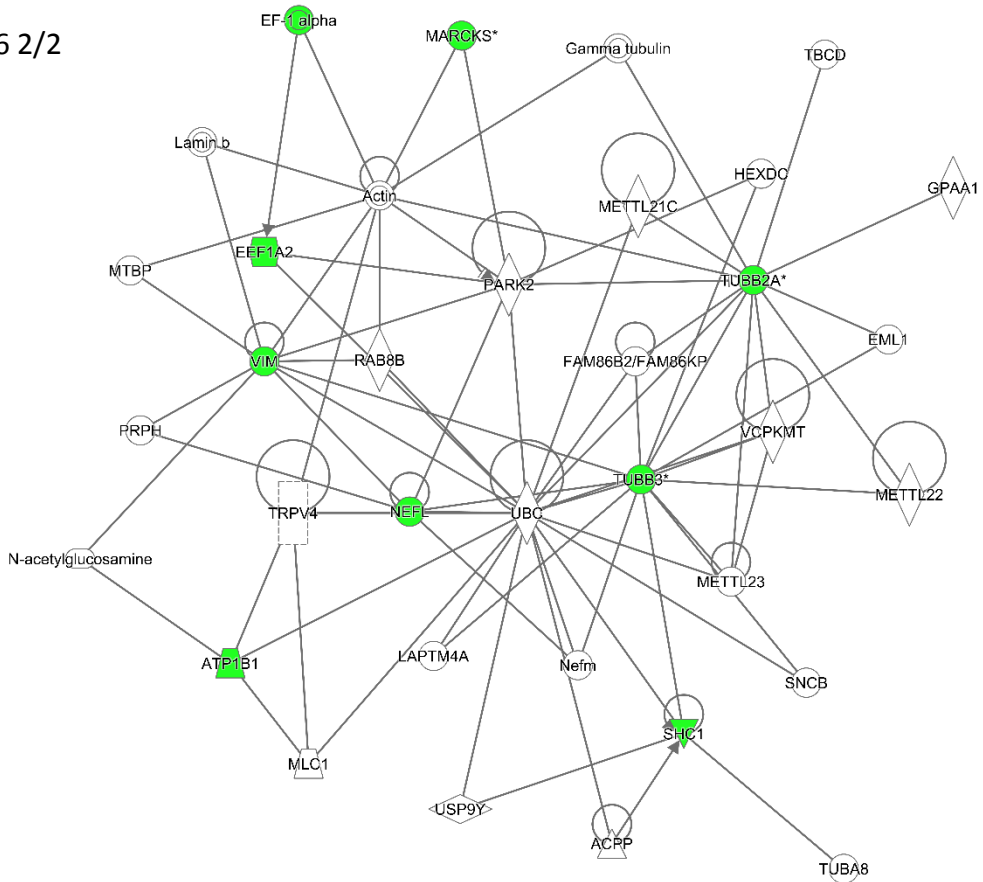

**Supplementary Figure 1.** IPA generated two gene networks (1/2 and 2/2) from genes overlapping in the BRD-K91844626 and TBI signatures. Network 2 highlighted downregulation of tubulins. Color codes: red, upregulated genes; green, downregulated genes by BRD-K91844626.

BRD-A11009626 1/2

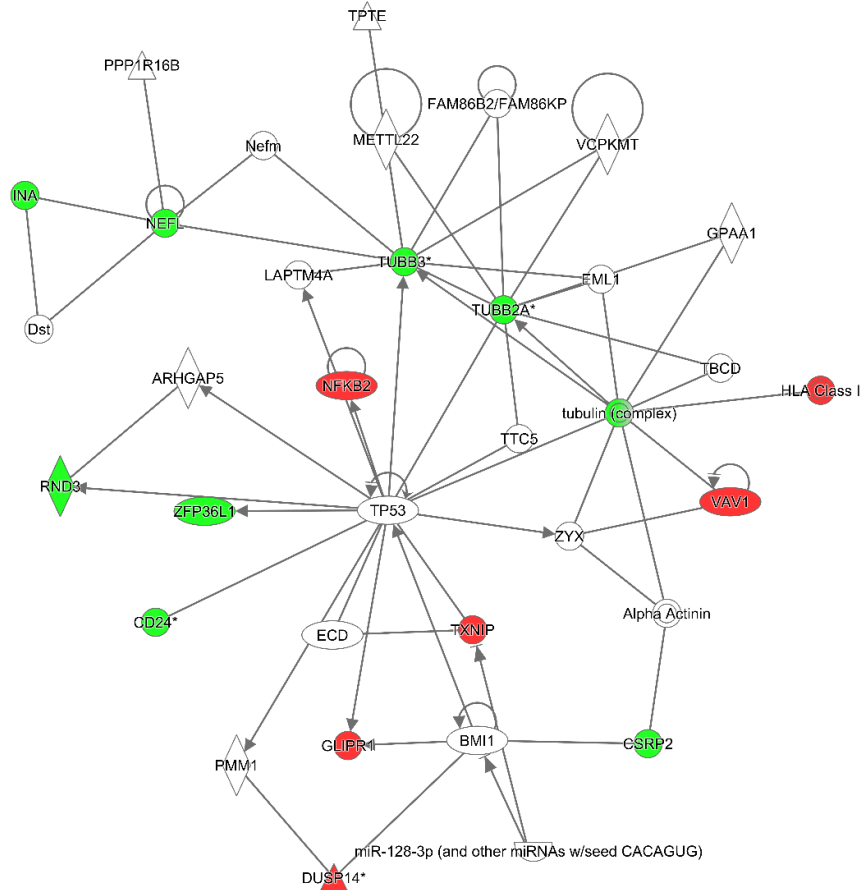

BRD-A11009626 2/2

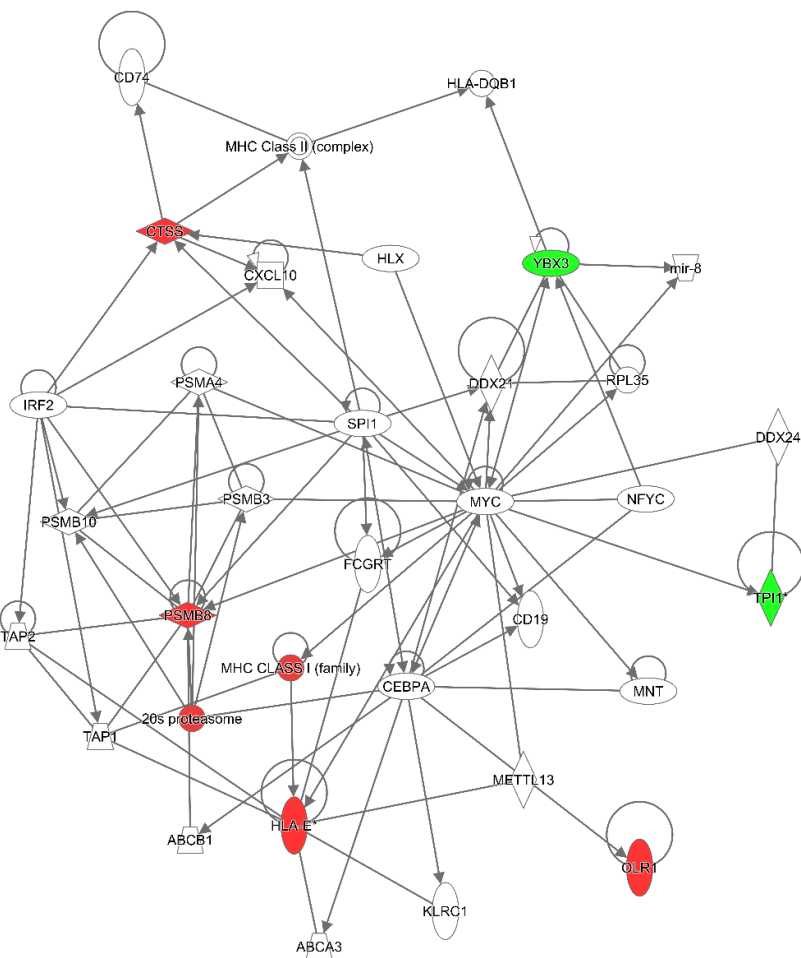

**Supplementary Figure 2.** IPA generated two gene networks (1/2 and 2/2) from genes overlapping in the BRD-A11009626 and TBI signatures. Network 1 highlighted downregulation of tubulins. Color codes: red, upregulated genes; green, downregulated genes by BRD-A11009626.

NO-ASA 1/3

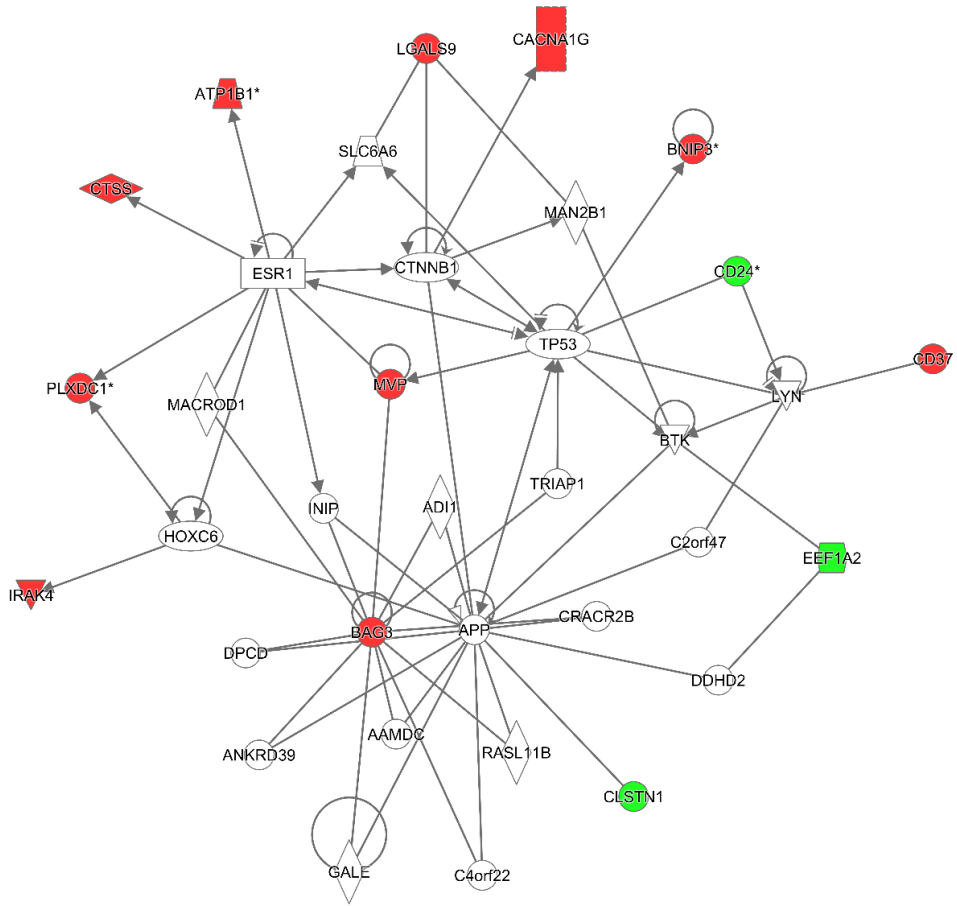

NO-ASA 2/3

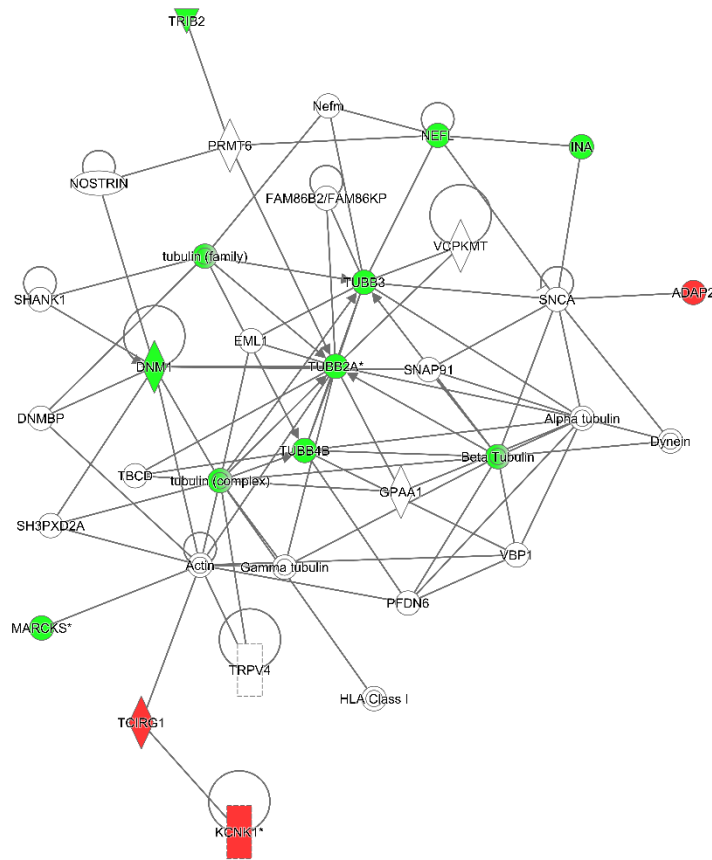

NO-ASA 3/3

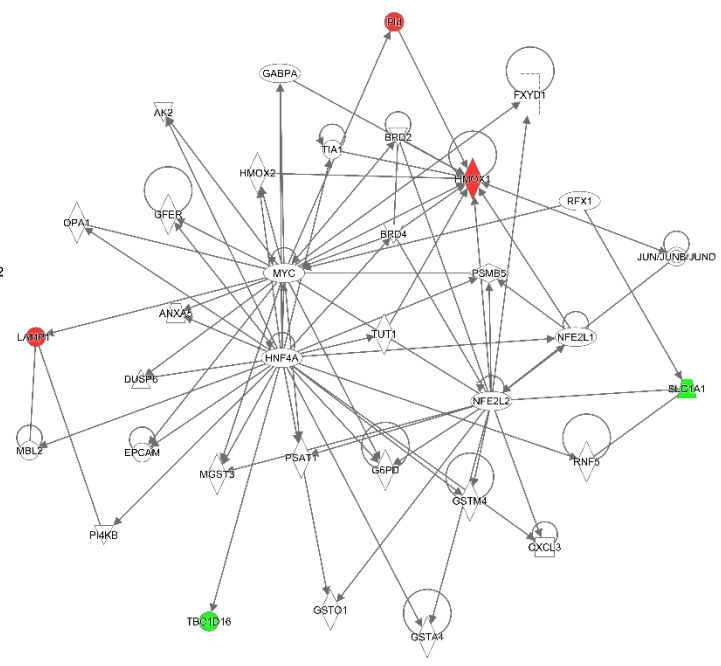

**Supplementary Figure 3.** IPA generated three gene networks (1/3, 2/3, and 3/3) from genes overlapping in the NO-ASA and TBI signatures. Network 2 highlighted downregulation of tubulins. Color codes: red, upregulated genes; green, downregulated genes by NO-ASA.

ionomycin 1/2

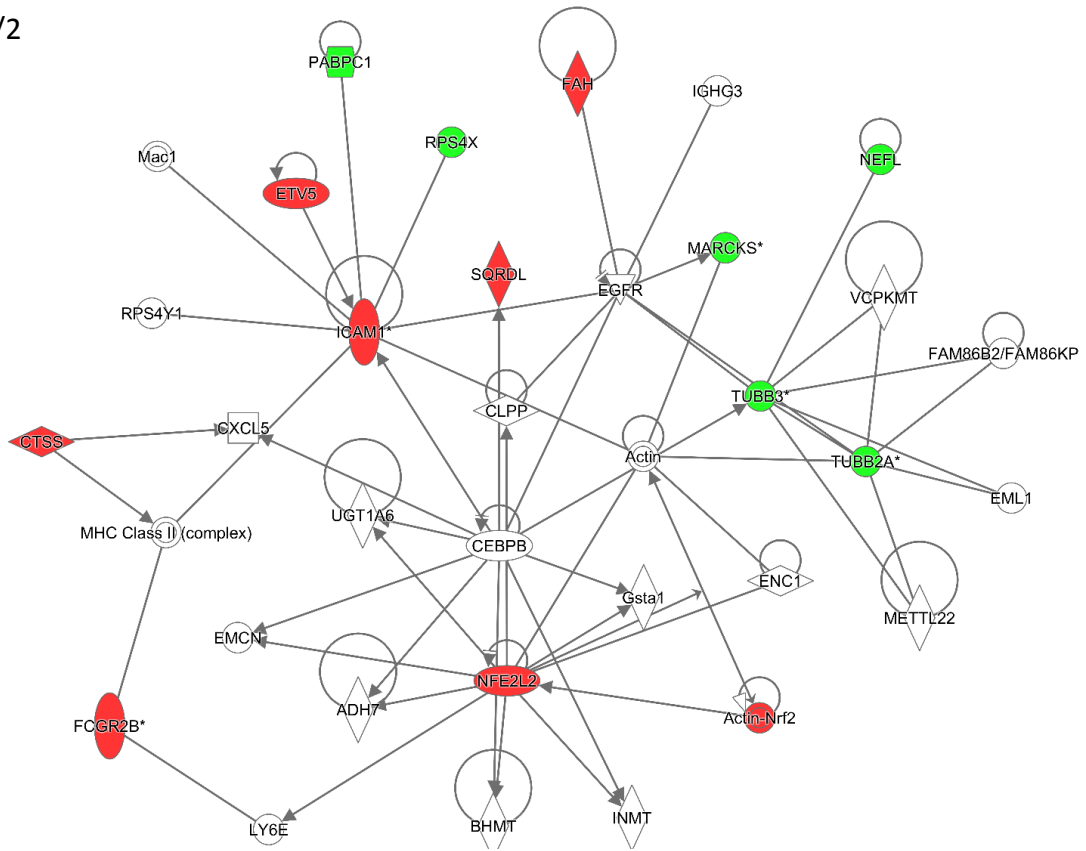

ionomycin 2/2

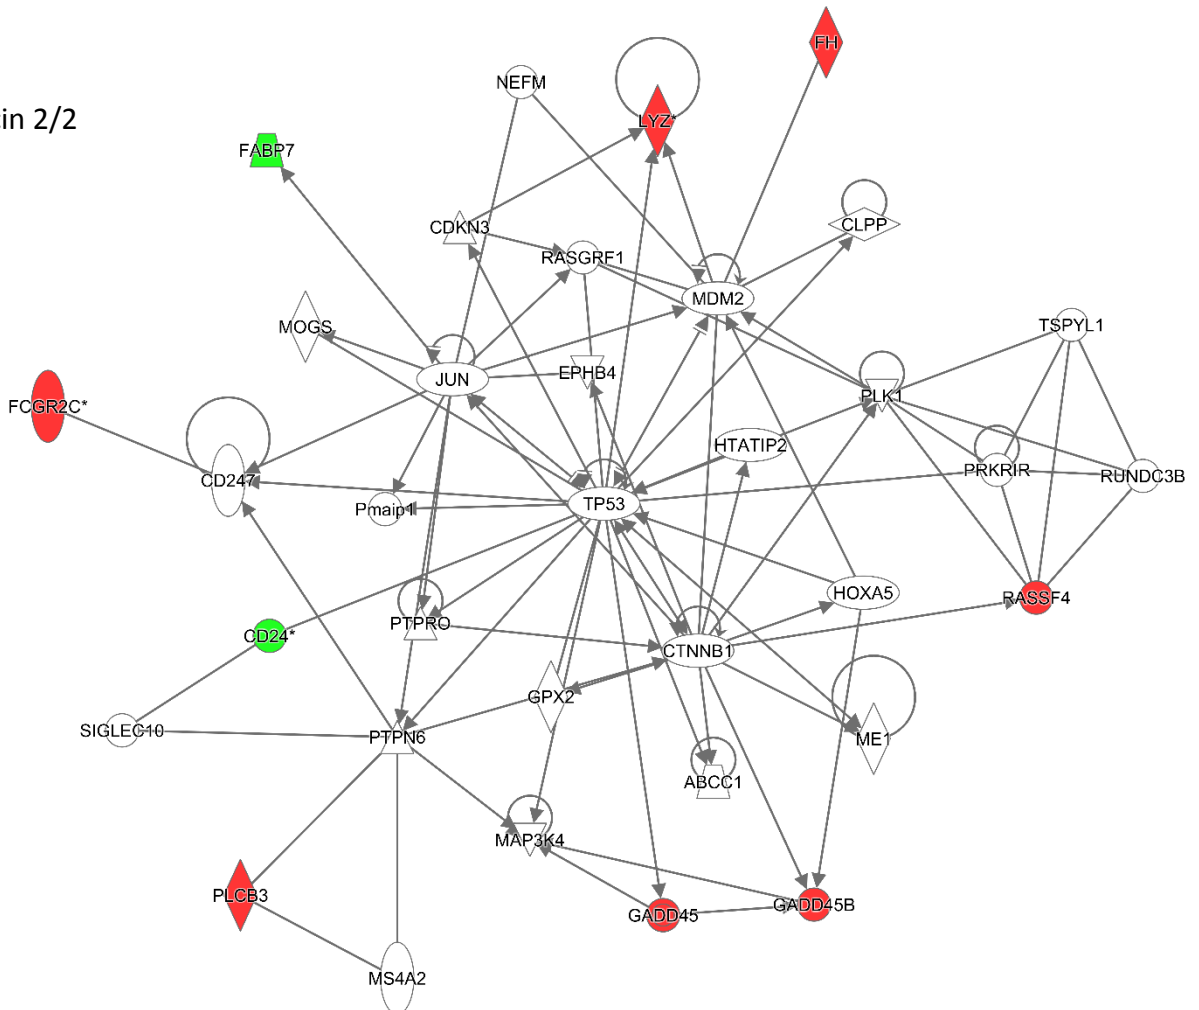

**Supplementary Figure 4.** IPA generated three gene networks (1/2 and 2/2) from the genes overlapping in the ionomycin and TBI signatures. Network 1 highlighted downregulation of tubulins and upregulation of NFE2L2. Color codes: red, upregulated genes; green, downregulated genes by ionomycin.

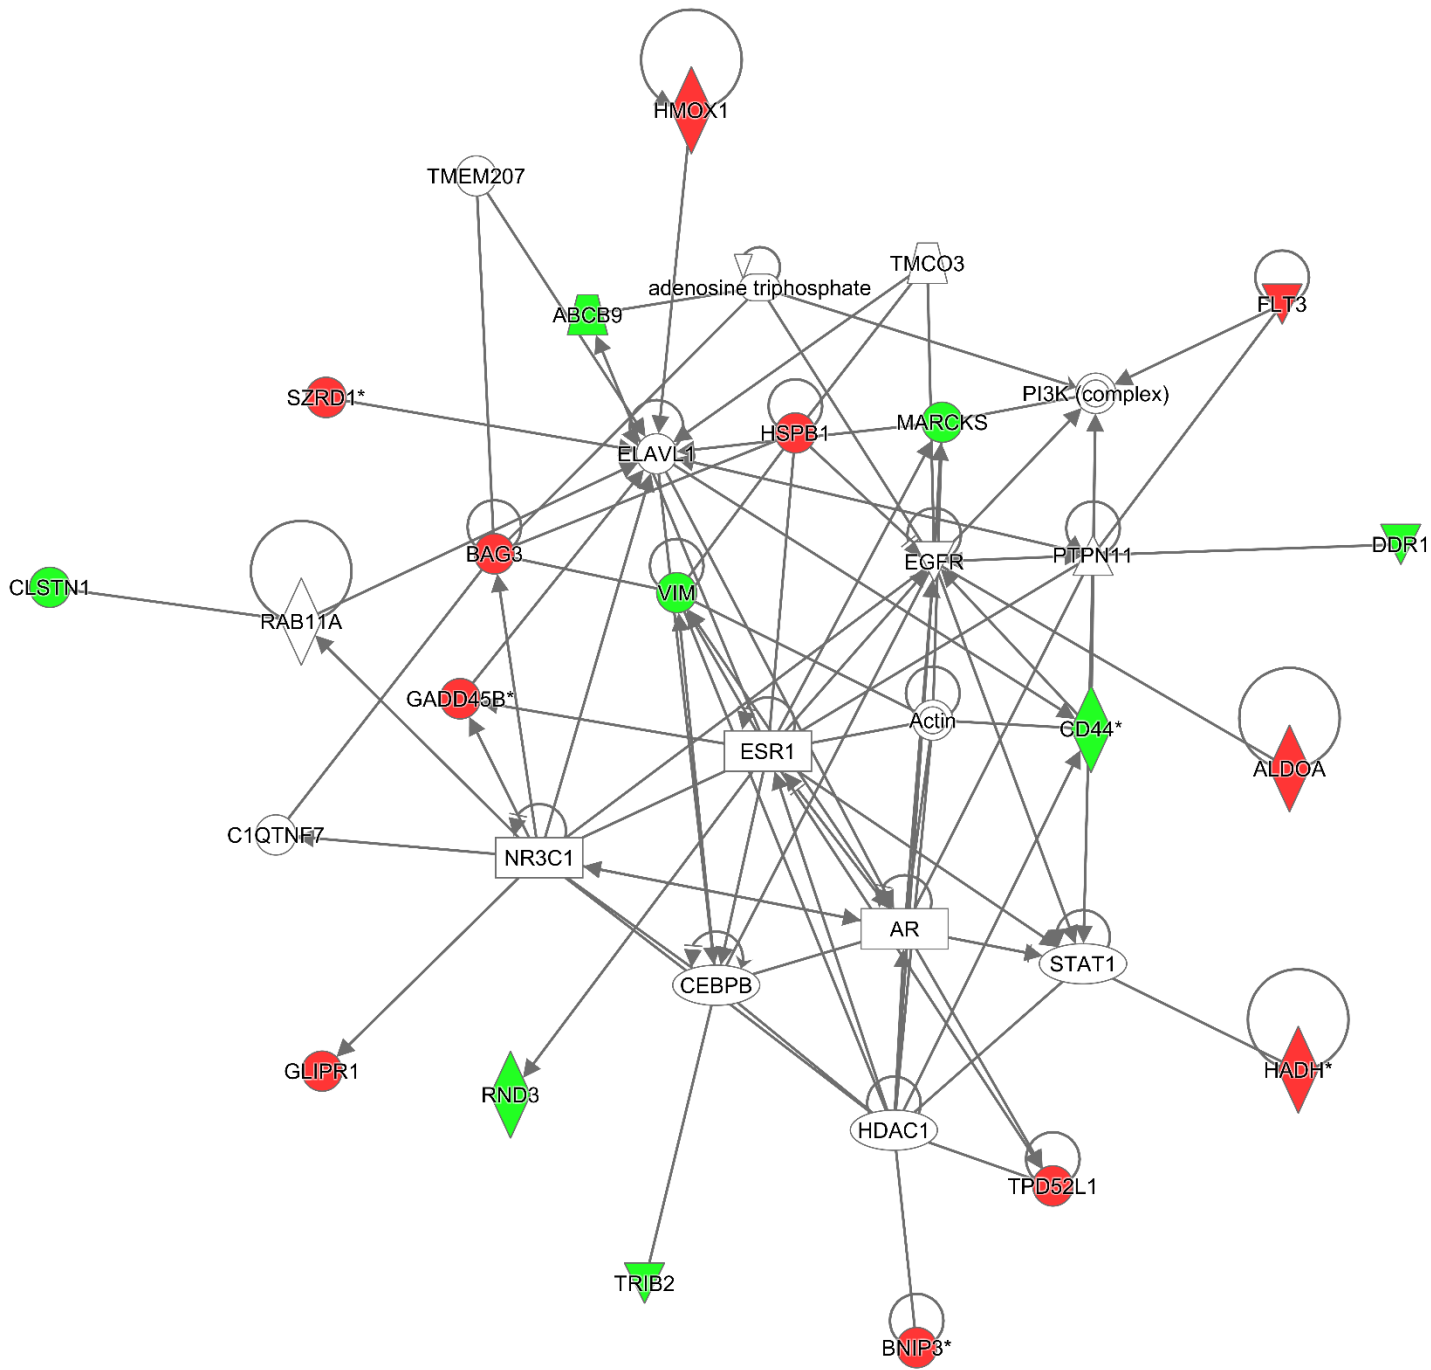

**Supplementary Figure 5.** IPA generated only one gene network (1/1) from genes overlapping in the BRD-K75971499 and TBI signatures. Network 1 highlighted CD44 downregulation. Color codes: red, upregulated genes; green, downregulated genes by BRD-K7597149.



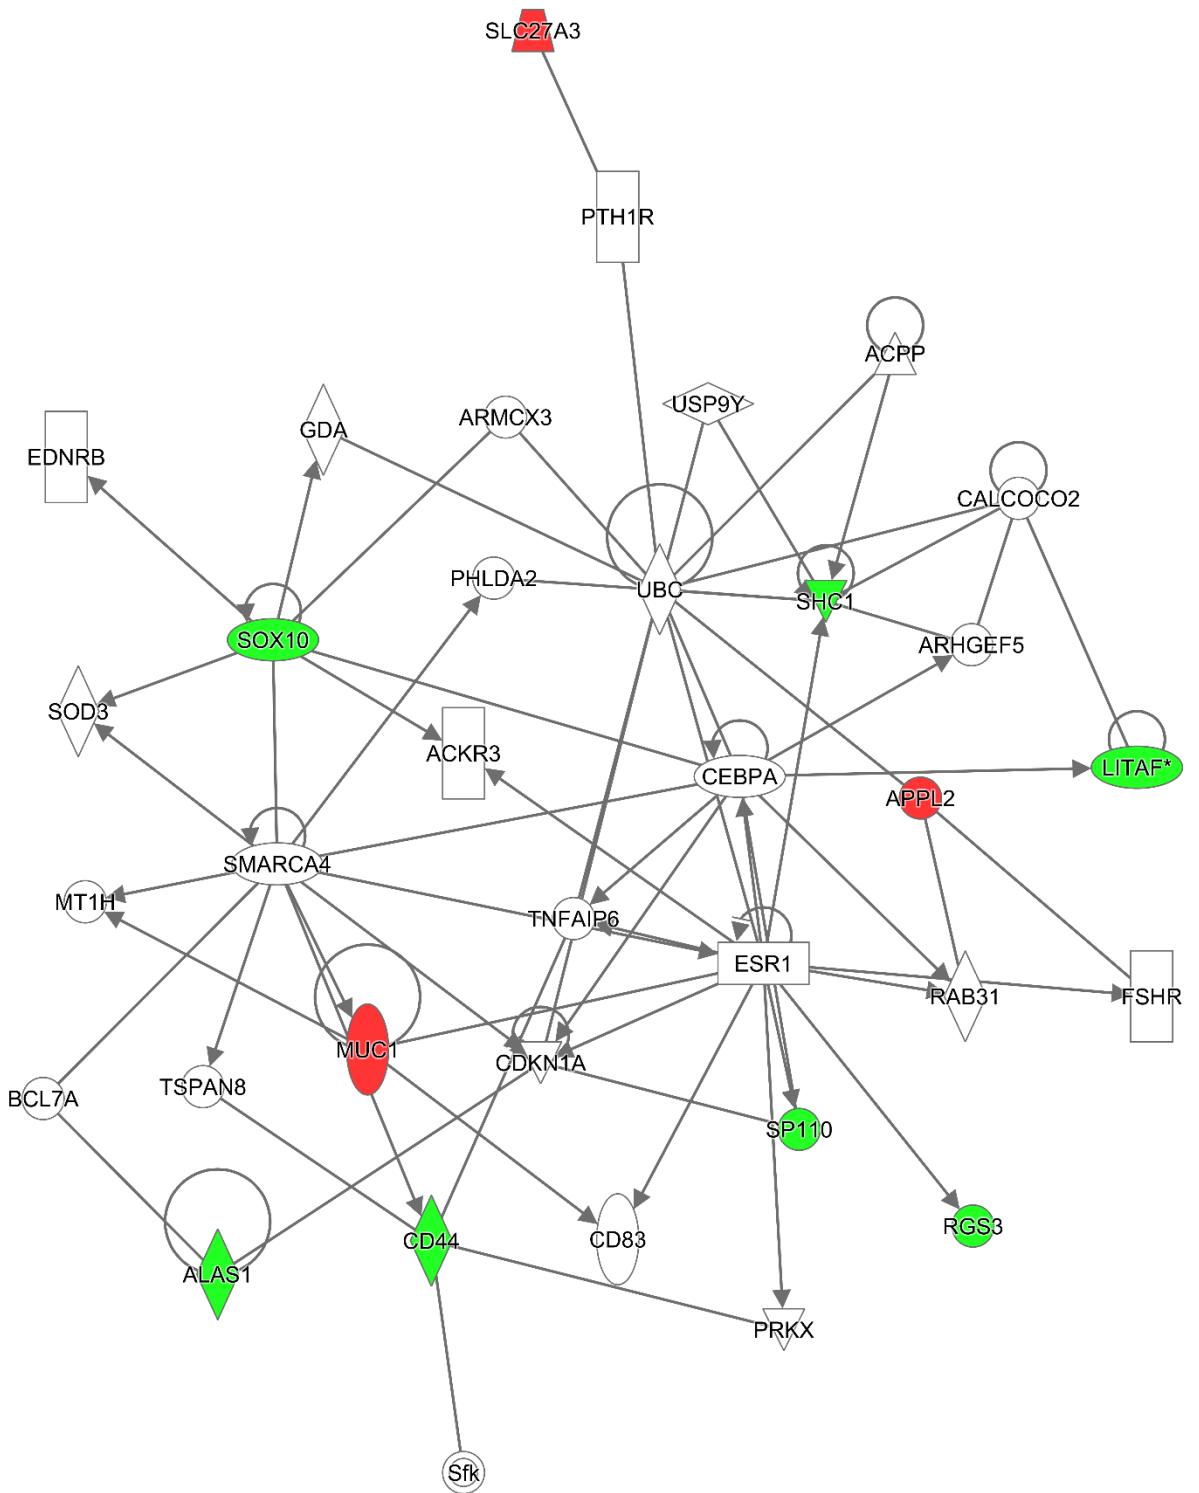

**Supplementary Figure 6.** IPA generated only one gene network (1/1) from genes overlapping in the BRD-K55260239 and TBI signatures. Network 1 highlighted CD44 downregulation. Color codes: red, upregulated genes; green, downregulated genes by BRD-K55260239.



STK-661558 1/2

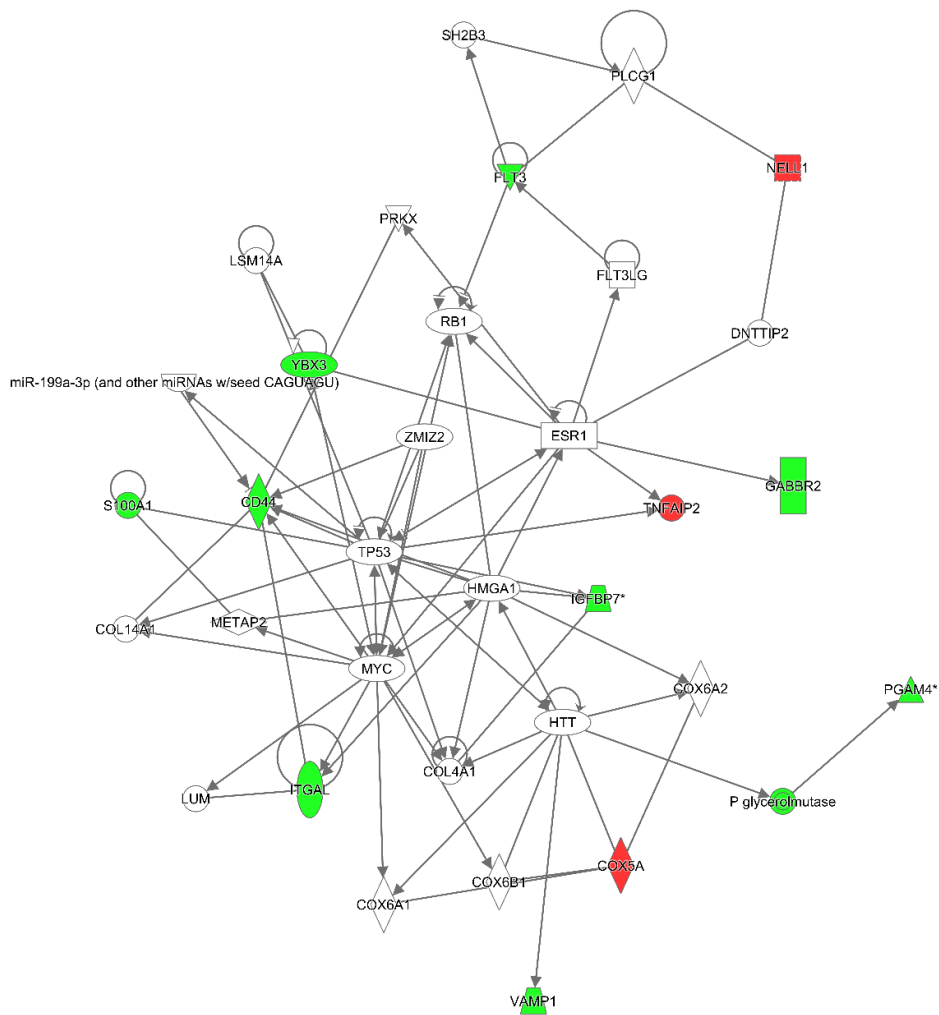

STK-661558 1/2

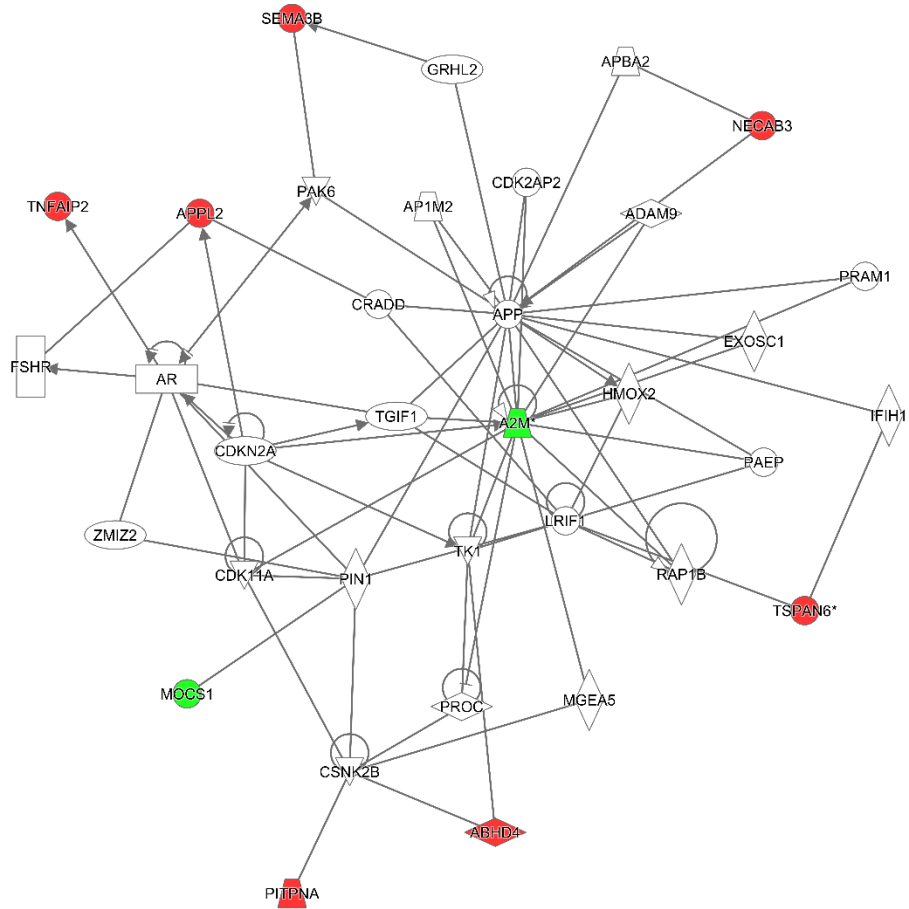

**Supplementary Figure 8.** IPA generated three gene networks (1/2 and 2/2) from genes overlapping in the STK-661558 and TBI signatures. Network 1 highlighted CD44 downregulation. Color codes: red, upregulated genes; green, downregulated genes by STK-661558.

sirolimus :

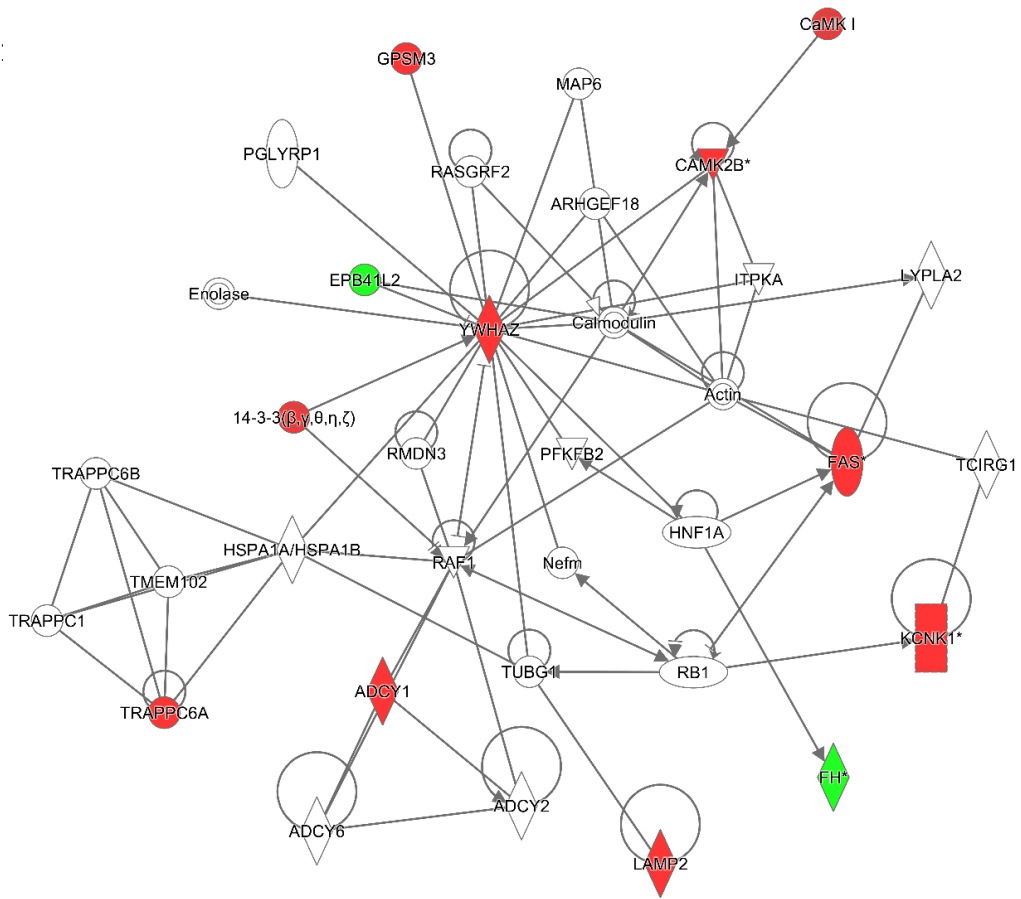

sirolimus 2/2

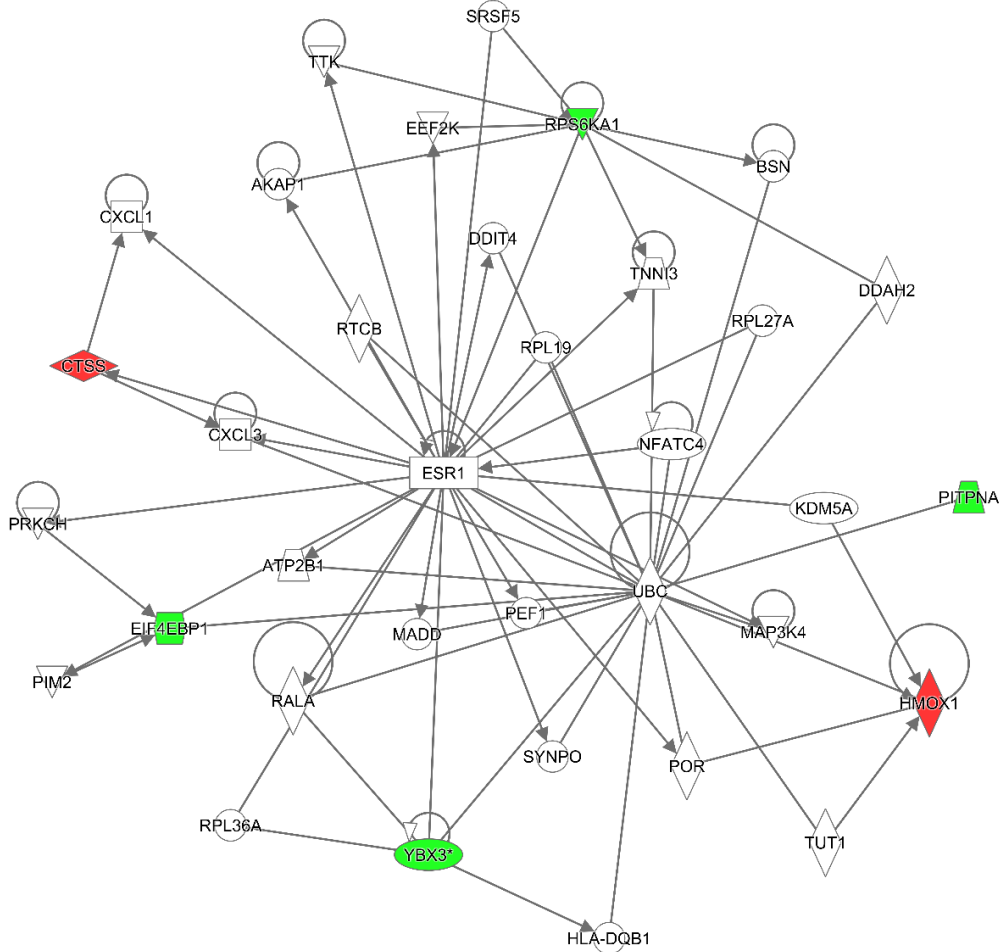

**Supplementary Figure 9.** IPA generated three gene networks (1/2 and 2/2) from genes overlapping in the sirolimus and TBI signatures. Network 1 highlighted YWHAZ upregulation. Color codes: red, upregulated genes; green, downregulated genes by sirolimus.



## References

1. Pitkänen, A. & McIntosh, T. K. Animal models of post-traumatic epilepsy. *J. Neurotrauma* **23**, 241–61 (2006).
2. Echegoyen, J., Armstrong, C., Morgan, R. J. & Soltesz, I. Single application of a CB1 receptor antagonist rapidly following head injury prevents long-term hyperexcitability in a rat model. *Epilepsy Res.* **85**, 123–7 (2009).
3. Smith, D. C. *et al.* Recovery of function after vagus nerve stimulation initiated 24 hours after fluid percussion brain injury. *J. Neurotrauma* **23**, 1549–60 (2006).
4. Pitkänen, A. & Lukasiuk, K. Mechanisms of epileptogenesis and potential treatment targets. *Lancet. Neurol.* **10**, 173–86 (2011).
